# Supplementary material
Source: PubMed Central journal article supplement (PMC3625970)
Supplement: NIHMS449607-supplement-1.pdf [file NIHMS449607-supplement-1.pdf]

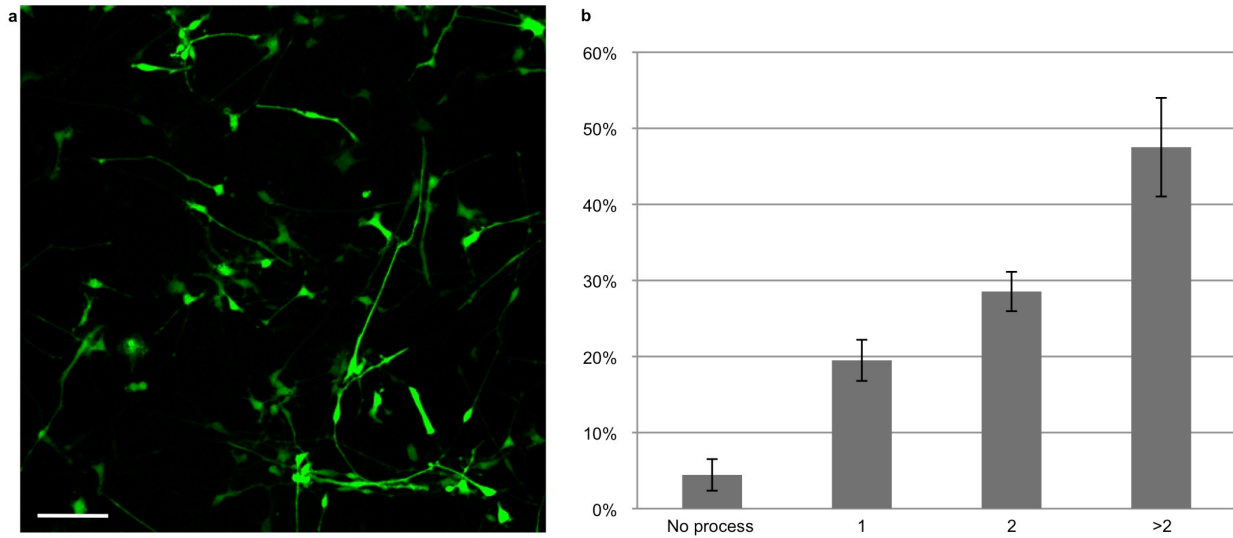

**Supplementary Figure S1. Composition of primary dissociated cortical progenitor cultures.**

**a)** Representative image of dissociated culture from GW16 human fetal cortex infected with Adeno-GFP. Scale bar, 100  $\mu\text{m}$ . **b)** Quantification of percentage of cells displaying each morphology type based on process number. Error bars represent standard deviation of percentile count from four random fields of approximately 770x770  $\mu\text{m}$ .
